# Supplementary material
Source: PubMed Central journal article supplement (PMC8477253)
Supplement: bmjgh-2020-003934supp001.pdf [file bmjgh-2020-003934supp001.pdf]

## Annex 1. Search strategy

LILACS – 5/19/2020

("ABORTION" OR "applicant, ABORTION" OR "applicants, ABORTION" OR "center, ABORTION" OR "centers, ABORTION" OR "clinic, ABORTION" OR "clinics, ABORTION" OR "criminal ABORTION" OR "illegal ABORTION" OR "induced ABORTION" OR "legal ABORTION" OR "seeker, ABORTION" OR "seeker, refused ABORTION" OR "seeker, repeated ABORTION" OR "seekers, ABORTION" OR "seekers, refused ABORTION" OR "seekers, repeated ABORTION" OR "ABORTION (induced)" OR "porcine epidemic ABORTION and respiratory syndrome" OR "ABORTION applicant" OR "ABORTION applicants" OR "ABORTION center" OR "ABORTION centers" OR "ABORTION clinic" OR "ABORTION clinics" OR "ABORTION on demand" OR "refused ABORTION seeker" OR "repeated ABORTION seeker" OR "ABORTION seeker, refused" OR "ABORTION seeker, repeated" OR "ABORTION seekers" OR "refused ABORTION seekers" OR "repeated ABORTION seekers" OR "ABORTION seekers, refused" OR "ABORTION seekers, repeated" OR "ABORTION, criminal" OR "ABORTION, drug induced" OR "ABORTION, drug-induced" OR "ABORTION, illegal" OR "ABORTION, incomplete" OR "ABORTION, legal" or "MISOPROSTOL" or "MIFEPRISTONE" or "agents, ABORTIFACIENT" or "agents, non-steroidal ABORTIFACIENT" or "agents, nonsteroidal ABORTIFACIENT" or "agents, steroidal ABORTIFACIENT" or "ABORTIFACIENT agents" or "non-steroidal ABORTIFACIENT agents" or "nonsteroidal ABORTIFACIENT agents" or "steroidal ABORTIFACIENT agents" or "ABORTIFACIENT agents, non steroidal" or "ABORTIFACIENT agents, non-steroidal" or "ABORTIFACIENT agents, nonsteroidal" or "ABORTIFACIENT agents, steroidal" or "ABORTIFACIENTs" or "steroid ABORTIFACIENTs" or "ABORTIFACIENTs, steroid" [Subject descriptor] and "CLINICAL TRIAL" or "CONTROLLED CLINICAL TRIAL" or "RANDOMIZED CONTROLLED TRIAL" [Publication type] (17)
