# Supplementary material
Source: PubMed Central journal article supplement (PMC8477253)
Supplement: bmjgh-2020-003934supp002.pdf [file bmjgh-2020-003934supp002.pdf]

Supplemental Table 1. Additional Study Data

| Study                  | Mifepristone dose (mg); misoprostol dose (µg), [supplementary dose of misoprostol, if offered] | Route of misoprostol administration | Hours between mifepristone and misoprostol administration | Maximum gestational age of participants (days) | Length of time between mifepristone administration and follow-up | Women accompanied during home administration of misoprostol (%) | Comparative participant characteristics at baseline*                                                                      |
|------------------------|------------------------------------------------------------------------------------------------|-------------------------------------|-----------------------------------------------------------|------------------------------------------------|------------------------------------------------------------------|-----------------------------------------------------------------|---------------------------------------------------------------------------------------------------------------------------|
| Akin et al. 2004       | 200; 400                                                                                       | Oral                                | 48                                                        | 56                                             | 14 days                                                          | 55                                                              | No significant differences between groups                                                                                 |
| Alam et al. 2013       | 200; 800 [800]                                                                                 | Buccal                              | 48                                                        | 63                                             | 10-14 days                                                       | 73.3                                                            | No significant differences between groups                                                                                 |
| Alam et al. 2018       | 200; 800                                                                                       | Buccal                              | 24                                                        | 63                                             | 10-14 days                                                       | 79.0                                                            | Unclear; no comparison reported                                                                                           |
| Bracken et al. 2006    | 200; 400                                                                                       | Oral                                | 48                                                        | 56                                             | 14 days                                                          | 67.8                                                            | No significant differences between groups                                                                                 |
| Bracken et al. 2010    | 200; 400                                                                                       | Oral                                | 48                                                        | 56                                             | 14 days                                                          | 84.2                                                            | Home users were 1.6 y older than clinic users on average ( $p=0.008$ )                                                    |
| Dagousset et al. 2004, | 600; 400 [400**]                                                                               | Oral                                |                                                           | 49                                             | 10-15 days                                                       | NR                                                              | Home users were older and more educated and fewer of them were primigravida; marital status not reported                  |
| Elul et al. 2001       | 200; 400                                                                                       | Oral                                | 48                                                        | 56                                             | 14 days                                                          | 78                                                              | Unclear; No comparison reported; marital status not reported                                                              |
| Elul et al. 2001       | 200; 400                                                                                       | Oral                                | 48                                                        | 56                                             | 14 days                                                          | 76                                                              | Unclear; no comparison reported; marital status not reported                                                              |
| Hajri et al. 2004      | 200; 400                                                                                       | Oral                                | 48                                                        | 56                                             | 14 days                                                          | ~75                                                             | Home users were more educated than clinic users by an average of 1.4 y ( $P = 0.02$ )                                     |
| Iyengar et al. 2016    | 200; 800 [400]                                                                                 | Varied                              | 48                                                        | 63                                             | 10-15 days                                                       | 74.141                                                          | Home users were younger than clinic users by an average of 1.1 y ( $p=0.016$ ). Clinic users had a higher gestational age |

|                                   |          |            |       |    |                                           |              |                                                                                                                                                                                        |
|-----------------------------------|----------|------------|-------|----|-------------------------------------------|--------------|----------------------------------------------------------------------------------------------------------------------------------------------------------------------------------------|
|                                   |          |            |       |    |                                           |              | by an average of 1.2 w (p=0.000)                                                                                                                                                       |
| Karki et al. 2009 <sup>1</sup>    | 200; 400 | Oral       | 48    | 56 | 12 days                                   | 77.9         | Unclear; no comparison reported                                                                                                                                                        |
| Li et al. 2017                    | 75; 400  | Oral       | 24    | 35 | Completion of post-treatment menstruation | NR           | No significant differences between groups                                                                                                                                              |
| Ngoc et al. 2004                  | 200; 400 | Oral       | 48    | 56 | 14 days                                   | 73.4         | Home users had an average of 2.4 y more of education (p<0.001), had lower maximum gestational age by an average of 1.5 w (p=0.001) and lower gravidity by an average of 7.7% (p<0.001) |
| Okonufua et al. 2014              | 200; 400 | Oral       | 48    | 63 | 14 days                                   | 42.2         | Unclear; no comparison reported                                                                                                                                                        |
| Provansal et al. 2009             | 600; 400 | Oral       | 36-48 | 49 | 10-20 days                                | 100          | Home users were older by an average of 2.3 y (p<0.001), had higher gestational age by an average of 1 w (p<.001), and had lower rates of parity by an average of 13.8% (p<.01)         |
| Raghavan et al. 2012              | 200; 400 | Oral       | 48    | 56 | 14 days                                   | Not reported | Unclear; no comparison reported                                                                                                                                                        |
| Shrestha et al. 2014 <sup>1</sup> | 200; 800 | Vaginal    | 24    | 63 | 14 days                                   | Not reported | No significant differences between groups                                                                                                                                              |
| Shuchita al. 2008                 | 200; 400 | Sublingual | 48    | 56 |                                           | 75           | Unclear; no comparison reported                                                                                                                                                        |
| Song 2018                         | 100; 200 | Sublingual | 24    | 49 | Completion of post-treatment menstruation | Not reported | No significant differences between groups; marital status and education not reported                                                                                                   |

\*p-values are reported where available

\*\*Additional 400 µg of misoprostol offered to clinic participants only

\*\*\*p < 0.05

Supplemental Table 2. Risk of Bias-RCTs, Successful abortion

| Study         | Random sequence generation | Allocation concealment | Blinding of personnel and participants | Blinding of outcome assessors | Incomplete outcome data | Selective outcome reporting | Overall |
|---------------|----------------------------|------------------------|----------------------------------------|-------------------------------|-------------------------|-----------------------------|---------|
| Li 2017       | Unclear                    | Unclear                | Low                                    | High                          | Low                     | Unclear                     | Unclear |
| Shrestha 2014 | Low                        | Unclear                | Low                                    | High                          | Low                     | Unclear                     | Unclear |
| Song 2018     | Unclear                    | Unclear                | Low                                    | High                          | Low                     | Low                         | Unclear |

Supplemental Table 3. Risk of Bias-NRSs, Successful abortion

| Study             | Confounding | Selection of participants into study | Classification of interventions | Deviations from intended interventions | Missing data | Measurement of outcomes | Selection of reported results | Overall bias |
|-------------------|-------------|--------------------------------------|---------------------------------|----------------------------------------|--------------|-------------------------|-------------------------------|--------------|
| Akin 2004         | High        | Moderate                             | Moderate                        | Low                                    | Low          | Moderate                | Low                           | Moderate     |
| Alam 2013         | High        | Moderate                             | Moderate                        | Low                                    | Moderate     | High                    | Moderate                      | High         |
| Alam 2018         | High        | Moderate                             | Moderate                        | Moderate                               | Moderate     | High                    | Moderate                      | High         |
| Bracken 2006      | High        | Moderate                             | Moderate                        | Low                                    | Moderate     | High                    | Moderate                      | High         |
| Bracken 2010      | High        | Moderate                             | Moderate                        | Low                                    | Moderate     | High                    | Moderate                      | High         |
| Dagousset 2004    | High        | Moderate                             | Moderate                        | Low                                    | Low          | High                    | Moderate                      | High         |
| Elul 2001-Tunisia | High        | Moderate                             | Moderate                        | Low                                    | Moderate     | High                    | Moderate                      | High         |
| Elul 2001-Vietnam | High        | Moderate                             | Moderate                        | Low                                    | Moderate     | High                    | Moderate                      | High         |
| Hajri 2004        | High        | Moderate                             | Moderate                        | Low                                    | Moderate     | High                    | Moderate                      | High         |
| Iyengar 2016      | High        | Moderate                             | Moderate                        | Low                                    | Moderate     | High                    | Moderate                      | High         |

|                |      |          |          |     |          |      |          |      |
|----------------|------|----------|----------|-----|----------|------|----------|------|
| Karki 2009     | High | Moderate | Moderate | Low | Moderate | High | Moderate | High |
| Ngoc 2004      | High | Moderate | Moderate | Low | Moderate | High | Moderate | High |
| Okonufua 2014  | High | Moderate | Moderate | Low | High     | High | Moderate | High |
| Provansal 2009 | High | Moderate | Moderate | Low | High     | High | Moderate | High |
| Raghavan 2012  | High | Moderate | Moderate | Low | Moderate | High | Moderate | High |
| Shuchita 2008  | High | Moderate | Moderate | Low | Low      | High | Moderate | High |
